# Supplementary material
Source: PubMed Central journal article supplement (PMC7191470)

## Supplementary Online Content

Wiviott SD, Giugliano RP, Morrow DA, et al. Effect of evolocumab on type and size of subsequent myocardial infarction: a prespecified analysis of the FOURIER randomized clinical trial. *JAMA Cardiol*. Published online April 29, 2020.  
doi:10.1001/jamacardio.2020.0764

**eTable:** Baseline Characteristics by MI During Follow Up

**eFigure 1:** CONSORT Diagram

**eFigure 2:** KM Rates of MI Stratified by Universal MI Types

**eFigure 3:** Effect of Evolocumab by Month of Treatment

This supplementary material has been provided by the authors to give readers additional information about their work.

eTable: Baseline Characteristics by MI During Follow Up

| FOURIER                                                  |                  |     |      |                     |       |       |         |
|----------------------------------------------------------|------------------|-----|------|---------------------|-------|-------|---------|
| <i>Baseline table, MI vs No MI during FU, ITT cohort</i> |                  |     |      |                     |       |       |         |
|                                                          | MI during FU (%) | n   | N    | No MI during FU (%) | n     | N     | p-value |
| Male                                                     | 77.9             | 862 | 1107 | 75.3                | 19933 | 26457 | 0.056   |
| Caucasian                                                | 87.4             | 968 | 1107 | 85.0                | 22490 | 26457 | 0.026   |
| Age >=75 years                                           | 12.3             | 136 | 1107 | 9.0                 | 2390  | 26457 | <0.001  |
| Age >=65 years                                           | 46.3             | 513 | 1107 | 44.4                | 11741 | 26457 | 0.198   |
| LDL at final screening >=85 mg/dl                        | 69.9             | 774 | 1107 | 64.9                | 17176 | 26453 | <0.001  |
| Region                                                   |                  |     |      |                     |       |       | <0.001  |
| North America                                            | 24.0             | 266 | 1107 | 16.3                | 4305  | 26457 |         |
| Europe                                                   | 61.2             | 678 | 1107 | 63.0                | 16657 | 26457 |         |
| Latin America                                            | 4.2              | 47  | 1107 | 6.7                 | 1776  | 26457 |         |
| Asia                                                     | 10.5             | 116 | 1107 | 14.1                | 3719  | 26457 |         |
| History of Prior MI                                      | 89.8             | 994 | 1107 | 80.7                | 21357 | 26457 | <0.001  |
| History of Stroke                                        | 15.8             | 175 | 1107 | 19.5                | 5162  | 26457 | 0.002   |
| History of PAD                                           | 18.0             | 199 | 1107 | 13.0                | 3443  | 26457 | <0.001  |
| Time to prior MI <2 years                                | 45.7             | 454 | 993  | 37.3                | 7948  | 21327 | <0.001  |
| >=2 Prior MIs                                            | 40.3             | 401 | 994  | 22.9                | 4884  | 21338 | <0.001  |
| Hx residual CAD with >= 40% stenosis in >=2 vessels      | 30.4             | 336 | 1104 | 21.4                | 5671  | 26441 | <0.001  |
| History of TIA                                           | 6.3              | 70  | 1107 | 5.4                 | 1439  | 26449 | 0.206   |
| History of Hypertension                                  | 82.7             | 916 | 1107 | 80.0                | 21168 | 26456 | 0.026   |
| History of Diabetes                                      | 46.2             | 511 | 1107 | 36.2                | 9570  | 26457 | <0.001  |
| Current Smoker                                           | 27.3             | 302 | 1107 | 28.3                | 7475  | 26455 | 0.480   |
| History CHF                                              | 26.4             | 292 | 1107 | 23.1                | 6102  | 26457 | 0.010   |
| Prior coronary revasc                                    | 78.0             | 862 | 1105 | 65.6                | 17331 | 26420 | <0.001  |
| Prior CABG                                               | 29.7             | 328 | 1105 | 18.5                | 4898  | 26418 | <0.001  |
| History PCI                                              | 66.7             | 737 | 1105 | 55.8                | 14736 | 26420 | <0.001  |

MI = myocardial infarction, FU = follow up n = number with a given characteristic, N = Number of subjects with or without MI, LDL = low density lipoprotein, PAD = peripheral artery disease, CAD = coronary artery disease, TIA = transient ischemic attack, CHF = congestive heart failure, CABG = coronary artery bypass grafting surgery, PCI = percutaneous coronary intervention

eFigure 1: CONSORT Diagram

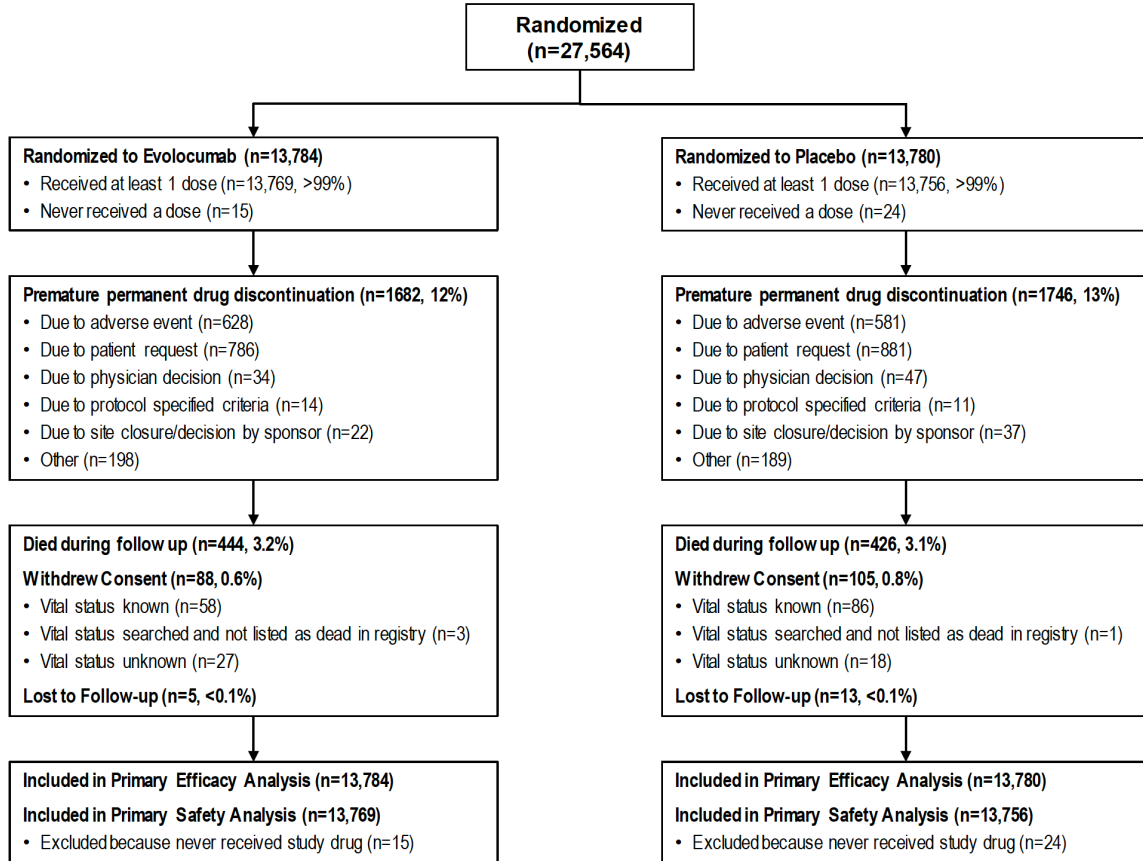

eFigure 2: KM Rates of MI Stratified by Universal MI Types

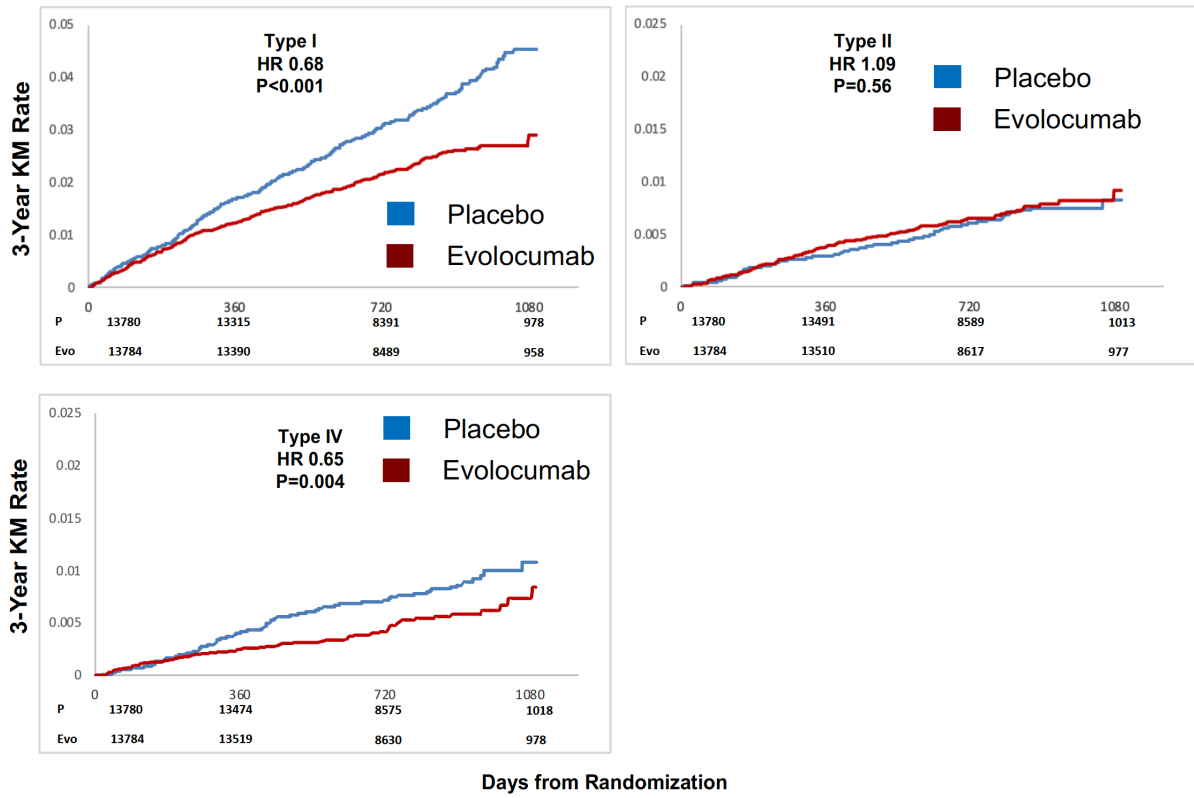

eFigure 3: Effect of Evolocumab by month of treatment.

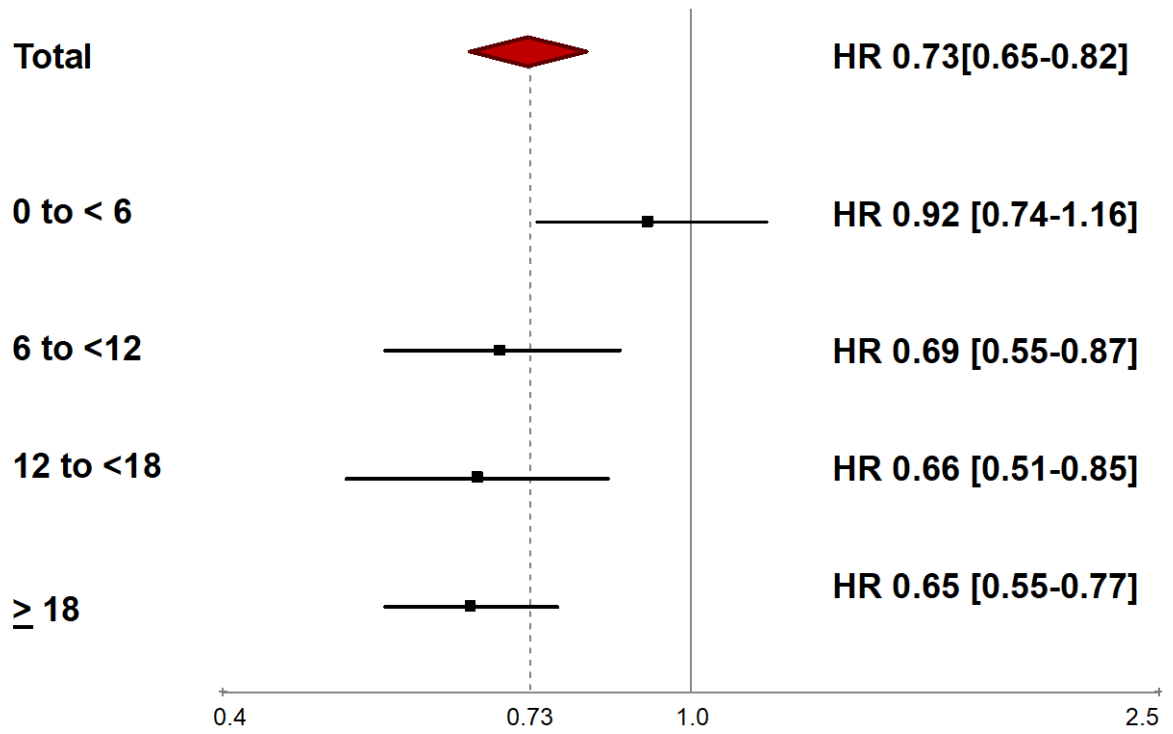

Supplement: jamacardiol-e200764-s002.pdf [file jamacardiol-e200764-s002.pdf]
